# Supplementary material for: Empagliflozin Induced Ketosis, Upregulated IGF-1/Insulin Receptors and the Canonical Insulin Signaling Pathway in Neurons, and Decreased the Excitatory Neurotransmitter Glutamate in the Brain of Non-Diabetics
Source: Cells. 2022 Oct 25;11(21):3372. doi: 10.3390/cells11213372 (PMC9657243; doi:10.3390/cells11213372)
Supplement: Supplementary file 1 [file cells-11-03372-s001.zip › Other material S2. Scanner specific LCModel í░control.txtí▒ file.txt]

 nsimul= 15
 chsimu(13)= 'Acn@2.22+-0. FWHM=-9.<0.+-0. AMP=6.'
 chsimu(14)= 'AcAc@2.27+-0. FWHM=-9.<0.+-0. AMP=3. @3.43 FWHM=-9. AMP=2.'
 chsimu(15)= 'bHb@1.179+-0. FWHM=-9.<0.+-0. AMP=1.5 @1.229 FWHM=-9. AMP=1.5'
