# Supplementary figures and images for: Empagliflozin Induced Ketosis, Upregulated IGF-1/Insulin Receptors and the Canonical Insulin Signaling Pathway in Neurons, and Decreased the Excitatory Neurotransmitter Glutamate in the Brain of Non-Diabetics
Source: MDPI journal article supplement (doi:10.3390/cells11213372), 2022-10-25

**Figure S1. Cryo-EM**

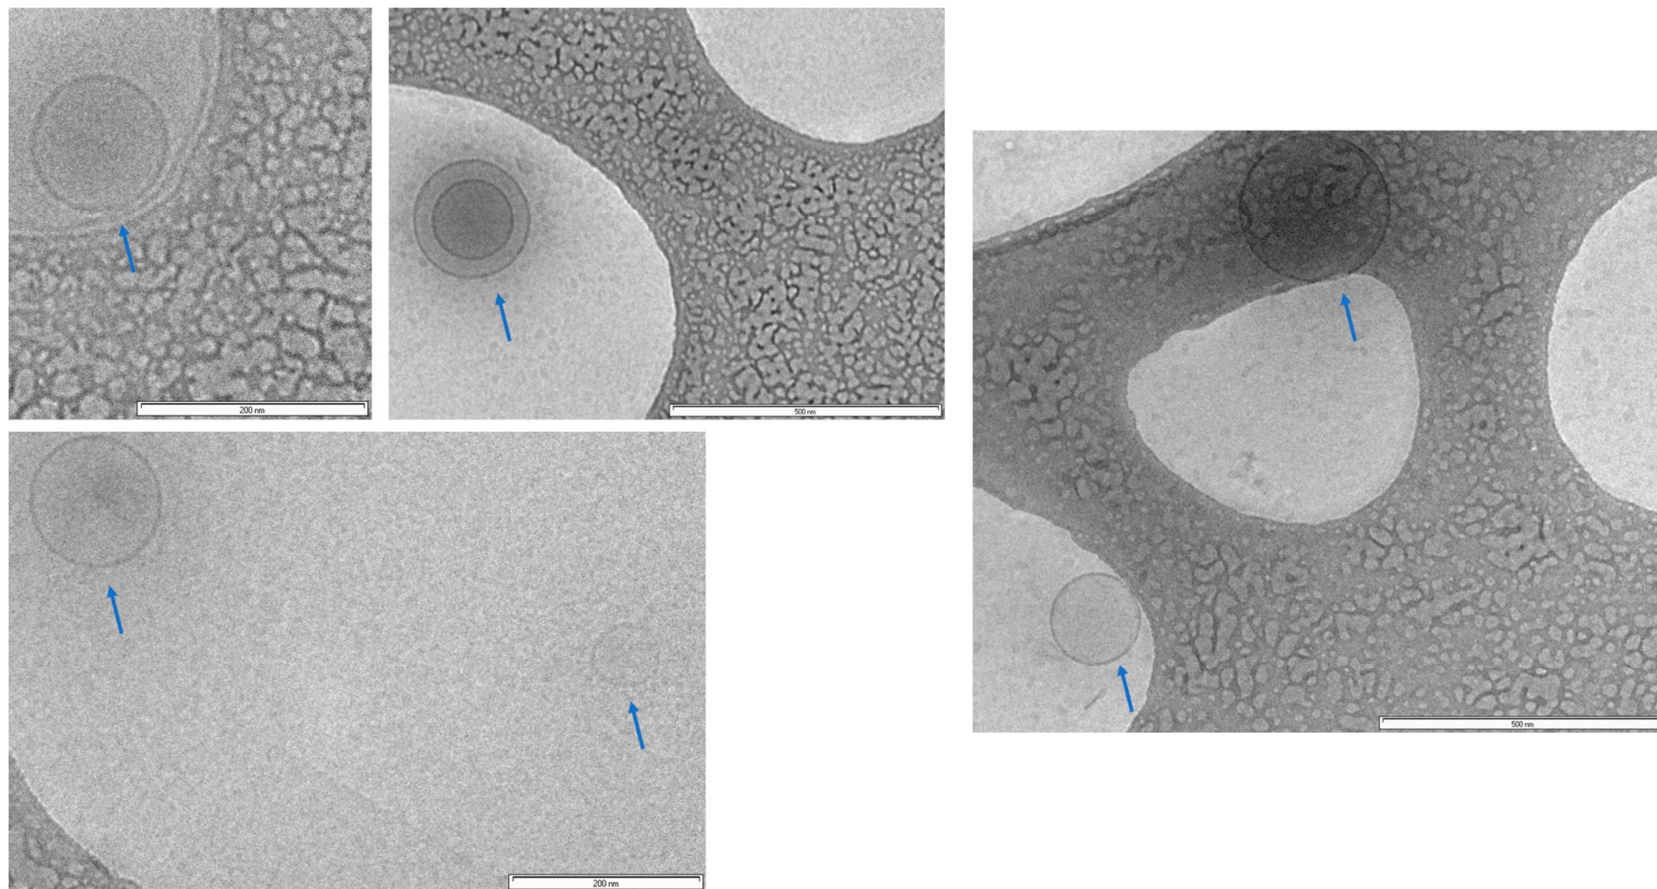

Supplement: s1 [file s1]
